# Supplementary material for: Validation of an acute respiratory infection phenotyping algorithm to support robust computerised medical record-based respiratory sentinel surveillance, England, 2023
Source: PubMed Central journal article supplement (PMC11484335; doi:10.2807/1560-7917.es.2024.29.35.2300682), 2024-08-29
Supplement: 23-00682_ELSON_Supplement.pdf [file 23-00682_ELSON_Supplement.pdf]

DISCLAIMER: "This supplementary material is hosted by *Eurosurveillance* as supporting information alongside the article: **Validation of an acute respiratory infection (ARI) phenotyping algorithm to support robust computerised medical record-based respiratory sentinel surveillance: English sentinel network approach**, on behalf of the authors, who remain responsible for the accuracy and appropriateness of the content. The same standards for ethics, copyright, attributions and permissions as for the article apply. Supplements are not edited by *Eurosurveillance* and the journal is not responsible for the maintenance of any links or email addresses provided therein."

## **SUPPLEMENT S1: CASE DEFINITIONS**

### ***ACUTE RESPIRATORY INFECTION (ARI)***

**Acute respiratory infection (ARI) European Union case definition, 2018**  
[1].

- *Sudden onset of symptoms*

AND

- *At least one of the following four respiratory symptoms*  
(1) *Cough*  
(2) *Sore throat*  
(3) *Shortness of breath*  
(4) *Coryza*

AND

- *A clinician's judgement that the illness is due to an infection*

### ***INFLUENZA-LIKE ILLNESS (ILI)***

We used the Royal College of General Practitioners Research and Surveillance (RCGP-RSC) ILI case definition [2].

*"An acute respiratory illness with a temperature measured as, reported as, or plausibly  $\geq 38$  °C and cough, with onset within the past 10 days. ILI cases should not have another more plausible diagnosis. ILI cases have a sudden onset, and there are often symptoms suggestive of systemic upset—myalgia, fatigue, malaise, headache, etc. RCGP RSC stresses the notion of symptoms within 10 days of onset to differentiate acute episodes, with swabs only wanted within 7 days of onset."*

### ***UPPER RESPIRATORY TRACT INFECTION (URTI)***

We created case definitions for URTI based consensus within our team of public health, clinical and informatics experts.

An acute infection of the respiratory tract above and including the larynx, encompassing the nasal mucosa, paranasal sinuses, middle ear, pharynx and larynx.

***LOWER RESPIRATORY TRACT INFECTION (LRTI)***

We created case definitions for LRTI based consensus within our team of public health, clinical and informatics experts.

An acute infection of the respiratory tract below the larynx, including bronchus, bronchioles and alveoli.

***EXACERBATIONS OF CHRONIC LUNG DISEASE (ECLD)***

We created case definitions for ECLD based consensus within our team of public health, clinical and informatics experts.

A sudden deterioration in respiratory symptoms such as cough, sputum production or breathlessness in an individual with underlying lung disease including chronic obstructive pulmonary disease, asthma and other chronic lung diseases.

## SUPPLEMENT S2: ARI CLINICAL QUALITY LOGIC (CQL)

The clinical quality language (CQL) script for the acute respiratory infection (ARI) phenotype definition.

```
Composite ARI(1).cql http://localhost:65529:27fe9d6d-1e0c-4004-8aaa-a07cee092ca0

~\Downloads\Composite ARI(1).cql

1 /**
2  * Orchid Phenotype
3  *
4  * Name : All ARI Acute Respiratory Tract Infections
5  * ID   : 1
6  * Url  : https://orchid.phc.ox.ac.uk/phenotype/138
7  */
8 library "All ARI Acute Respiratory Infections" version '1.0.0'
9
10 using FHIR version '4.0.0'
11
12 include FHIRHelpers version '4.0.0' called FHIRHelpers
13
14
15 valueset "URTI - NOS": '7212: ARI-UpperRespiratoryTractInfectionNOS'
16 valueset "Croup": '7204: ARI-Croup'
17 valueset "Laryngitis": '7197: ARI-Laryngitis'
18 valueset "Otitis Media": '7210: ARI-OtitisMedia'
19 valueset "Sinusitis": '7206: ARI-Sinusitis'
20 valueset "Tonsillitis and Pharyngitis": '7208: ARI-TonsillitisPharyngitis'
21 valueset "LRTI - NOS": '7214: ARI-LowerRespiratoryTractInfectionNOS'
22 valueset "Bronchiolitis": '7213: ARI-Bronchiolitis'
23 valueset "Bronchitis": '7211: ARI-Bronchitis'
24 valueset "Pneumonia": '7205: ARI-Pneumonia'
25 valueset "ARI - NOS": '7222: ARI-AcuteRespiratoryInfection'
26 valueset "Asthma Exacerbation": '7215: ARI-AsthmaExacerbation'
27 valueset "COPD Exacerbation": '7216: ARI-ChronicObstructivePulmonaryDiseaseExacerbation'
28 valueset "Respiratory Disease Exacerbation": '7221: ARI-RespiratoryDiseaseExacerbations'
29 valueset "Influenza Like Illness": '7199: ARI-InfluenzaLikeIllness'
30 valueset "Suspected Covid": '7223: ARI-CovidSuspected'
31
32 context Patient
33
34 define function "Previous Episodes in 28 days"(
35   dt System.DateTime
36 ):
37   (Condition: "All Acute Respiratory Tract Infections") C
38   where
39     dt before PhEMAHelpers."Effective Date"(C)
40     and
41     difference in days between dt
42     and
43     PhEMAHelpers."Effective Date"(C) < 28
44   return
45     PhEMAHelpers."Effective Date"(C)
46
47 define function "New ARI Episode":
48   (Condition: "All Acute Respiratory Tract Infections") ILI1
49   where
50     Count(
51       "Previous Episodes in 28 day"(PhEMAHelpers."Effective Date"(ILI1))
52     ) = 0
53
54 define "All Acute Respiratory Tract Infections":
55   flatten {[Condition: "Croup"],
56   [Condition: "Laryngitis"],
57   [Condition: "URTI - NOS"],
58   [Condition: "Otitis Media"],
59   [Condition: "Sinusitis"],
60   [Condition: "Tonsillitis and Pharyngitis"],
61   [Condition: "LRTI - NOS"],
62   [Condition: "Bronchiolitis"],
63   [Condition: "Bronchitis"],
64   [Condition: "Pneumonia"],
65   [Condition: "ARI - NOS"],
66   [Condition: "Asthma Exacerbation"],
67   [Condition: "COPD Exacerbation"],
68   [Condition: "Respiratory Disesae Exacerbation"],
69   [Condition: "Influenza Like Illness"],
70   [Condition: "Suspected Covid"]}
71
72
73 define "case":
74   "New ARI episode"
```

### SUPPLEMENT S3: PHYSICIAN FLOW CHART FOR RECORDING ARI

Flow chart provided to RSC member primary care practices to support accurate coding of ARI cases by clinicians. We generally try to discourage coding of ARI-NOS as this allows us to be more specifically assign cases to a level 2 indicator. ARI-NOS is therefore not included in this flow chart.

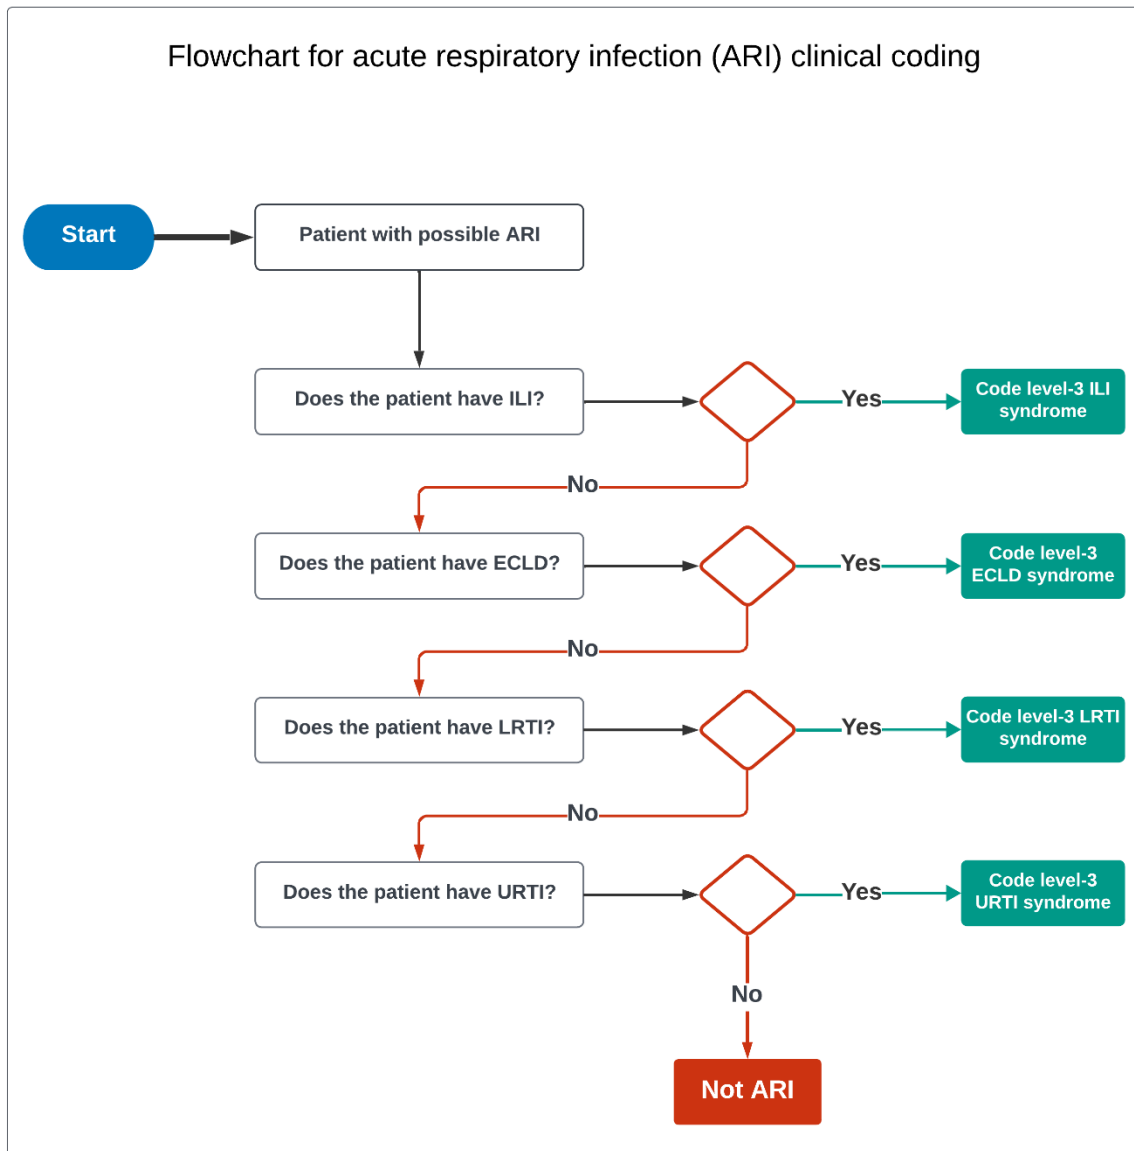

## SUPPLEMENT S4: EXPRESSION CONSTRAINT LANGUAGE (ECL)

Example of SNOMED Expression Constraint Language (ECL) for pharyngitis.

Most codelists were defined using the following three steps: **Step 1:** Inclusion of a principal SNOMED supertype(s) and all its descendant codes. For example, we include sinusitis and all its descendant codes, such as frontal sinusitis **Step 2:** We usually did not want to include all descendant codes in the final codelist so rather than pick out individual codes to remove we excluded codes at a higher level in the hierarchy. For example, we excluded a code for chronic disease, which are not relevant to ARI. This has the effect of removing all sinusitis descendant codes that represent instances of chronic sinusitis. **Step 3:** Finally, each codelist needed inclusion or exclusion of specific codes only, allowing for tailored changes to meet the needs of the specific codelist.

```
<< 405737000 | Pharyngitis | ← STEP 1
MINUS (
  << 281647001 | Adverse reaction | OR
  << 85828009 | Autoimmune disease | OR
  << 27624003 | Chronic disease | OR
  << 66091009 | Congenital disease | OR
  << 312087002 | Disorder following clinical procedure | OR
  << 414025005 | Disorder of fetus or newborn | OR
  << 17322007 | Parasitic disease | OR
  << 443138004 | Granulomatosis | OR
  << 408678008 | Healthcare associated infectious disease | OR
  << 473010000 | Hypersensitivity condition | OR
  << 41969006 | Idiopathic disease | OR
  << 3218000 | Mycosis | OR
  << 399981008 | Neoplasm and/or hamartoma | OR
  << 441456002 | Polyp | OR
  << 56717001 | Tuberculosis | OR
  << 275488008 | Chronic sore throat | ← STEP 3
)
```

The diagram illustrates the three steps of ECL construction for pharyngitis. Step 1 is the inclusion of the principal code 405737000. Step 2 is the exclusion of various supertypes like Adverse reaction, Autoimmune disease, Chronic disease, Congenital disease, Disorder following clinical procedure, Disorder of fetus or newborn, Parasitic disease, Granulomatosis, Healthcare associated infectious disease, Hypersensitivity condition, Idiopathic disease, Mycosis, Neoplasm and/or hamartoma, and Tuberculosis. Step 3 is the inclusion of the specific code 275488008 for Chronic sore throat.

## SUPPLEMENT S5: CODELISTS

Codelists generated from use of SNOMED ECL for all sixteen new level 3 indicators:

- 1) ARI-AsthmaExacerbation
- 2) ARI-ChronicObstructivePulmonaryDiseaseExacerbation
- 3) ARI-RespiratoryDiseaseExacerbations
- 4) ARI-InfluenzaLikeIllness
- 5) ARI-Bronchiolitis
- 6) ARI-Bronchitis
- 7) ARI-LowerRespiratoryTractInfectionNOS
- 8) ARI-Pneumonia
- 9) ARI-AcuteRespiratoryInfectionNOS
- 10) ARI-CovidSuspected
- 11) ARI-Croup
- 12) ARI-Laryngitis
- 13) ARI-OtitisMedia
- 14) ARI-Sinusitis
- 15) ARI-TonsillitisPharyngitis
- 16) ARI-UpperRespiratoryTractInfectionNOS

| Level 3 indicator | SNOMED ConceptID | SNOMED Preferred term                             |
|-------------------|------------------|---------------------------------------------------|
| ARI-Laryngitis    | #10809006        | Parainfluenza virus laryngotracheitis             |
| ARI-Laryngitis    | #13617004        | Tracheobronchitis                                 |
| ARI-Laryngitis    | #14969004        | Catarrhal laryngitis                              |
| ARI-Laryngitis    | #195680000       | Acute oedematous laryngitis                       |
| ARI-Laryngitis    | #195681001       | Acute ulcerative laryngitis                       |
| ARI-Laryngitis    | #195682008       | Acute catarrhal laryngitis                        |
| ARI-Laryngitis    | #195683003       | Acute phlegmonous laryngitis                      |
| ARI-Laryngitis    | #195684009       | Acute laryngitis caused by Haemophilus influenzae |
| ARI-Laryngitis    | #195685005       | Acute pneumococcal laryngitis                     |
| ARI-Laryngitis    | #195686006       | Acute suppurative laryngitis                      |
| ARI-Laryngitis    | #195709006       | Pharyngolaryngitis                                |
| ARI-Laryngitis    | #195923003       | Influenza with laryngitis                         |
| ARI-Laryngitis    | #232426008       | Acute simple laryngitis                           |
| ARI-Laryngitis    | #232428009       | Acute membranous laryngitis                       |
| ARI-Laryngitis    | #232429001       | Acute subglottic laryngitis                       |
| ARI-Laryngitis    | #233799004       | Acute toxic tracheobronchitis                     |
| ARI-Laryngitis    | #26650005        | Acute tracheitis                                  |
| ARI-Laryngitis    | #301824001       | Acute viral laryngotracheitis                     |
| ARI-Laryngitis    | #312400008       | Acute infective tracheobronchitis                 |
| ARI-Laryngitis    | #312423006       | Infective laryngitis                              |
| ARI-Laryngitis    | #32904004        | Pneumococcal laryngitis                           |
| ARI-Laryngitis    | #35301006        | Acute tracheobronchitis                           |

|                          |                    |                                                          |
|--------------------------|--------------------|----------------------------------------------------------|
| ARI-Laryngitis           | #37426002          | Ulcerative laryngitis                                    |
| ARI-Laryngitis           | #37948003          | Acute laryngotracheitis without obstruction              |
| ARI-Laryngitis           | #408669002         | Acute laryngitis with obstruction                        |
| ARI-Laryngitis           | #41048006          | Haemophilus influenzae laryngitis                        |
| ARI-Laryngitis           | #441551009         | Viral laryngitis                                         |
| ARI-Laryngitis           | #45913009          | Laryngitis                                               |
| ARI-Laryngitis           | #50211006          | Catarrhal tracheitis                                     |
| ARI-Laryngitis           | #55130001          | Laryngotracheitis                                        |
| ARI-Laryngitis           | #55355000          | Acute laryngopharyngitis                                 |
| ARI-Laryngitis           | #59967003          | Acute laryngotracheitis with obstruction                 |
| ARI-Laryngitis           | #62994001          | Tracheitis                                               |
| ARI-Laryngitis           | #64369009          | Acute tracheitis without obstruction                     |
| ARI-Laryngitis           | #64375000          | Acute laryngotracheitis                                  |
| ARI-Laryngitis           | #66011008          | Viral tracheitis                                         |
| ARI-Laryngitis           | #6655004           | Acute laryngitis                                         |
| ARI-Laryngitis           | #709663002         | Supraglottitis                                           |
| ARI-Laryngitis           | #82690000          | Suppurative laryngitis                                   |
| ARI-Laryngitis           | #85083002          | Streptococcal laryngitis                                 |
| ARI-Laryngitis           | #8519009           | Acute tracheitis with obstruction                        |
| ARI-Laryngitis           | #85832003          | Parainfluenza virus laryngitis                           |
| ARI-Laryngitis           | #86773000          | Oedematous laryngitis                                    |
| ARI-Laryngitis           | #95886009          | Mycoplasmal tracheobronchitis                            |
| ARI-InfluenzaLikeIllness | #1033051000000101  | Influenza due to zoonotic influenza virus                |
| ARI-InfluenzaLikeIllness | #1033071000000105  | Influenza due to pandemic influenza virus                |
| ARI-InfluenzaLikeIllness | #1033091000000109  | Influenza due to seasonal influenza virus                |
| ARI-InfluenzaLikeIllness | #1033111000000104  | Influenza with pneumonia due to seasonal influenza virus |
| ARI-InfluenzaLikeIllness | #10624911000119107 | Otitis media due to H1N1 influenza                       |
| ARI-InfluenzaLikeIllness | #10624951000119108 | Otitis media due to influenza                            |
| ARI-InfluenzaLikeIllness | #10628871000119101 | Gastroenteritis due to influenza                         |
| ARI-InfluenzaLikeIllness | #10628911000119103 | Gastroenteritis due to Influenza A virus                 |
| ARI-InfluenzaLikeIllness | #10629191000119100 | Bronchiolitis caused by influenza virus                  |
| ARI-InfluenzaLikeIllness | #10629351000119108 | Myocarditis due to Influenza A virus                     |
| ARI-InfluenzaLikeIllness | #10674911000119108 | Otitis media due to Influenza A virus                    |
| ARI-InfluenzaLikeIllness | #10677711000119101 | Encephalopathy due to Influenza A virus                  |
| ARI-InfluenzaLikeIllness | #10685111000119102 | Upper respiratory tract infection due to Influenza       |
| ARI-InfluenzaLikeIllness | #1149091008        | Influenza caused by Influenza A virus subtype H2         |
| ARI-InfluenzaLikeIllness | #142931000119100   | Pneumonia due to H1N1 influenza                          |
| ARI-InfluenzaLikeIllness | #142941000119109   | Upper respiratory tract infection due to H1N1 influenza  |
| ARI-InfluenzaLikeIllness | #142951000119106   | Myocarditis due to Influenza A virus subtype H1N1        |

|                         |                  |                                                      |
|-------------------------|------------------|------------------------------------------------------|
| ARI-InfluenzaLikellness | #142961000119108 | Gastroenteritis due to H1N1 influenza                |
| ARI-InfluenzaLikellness | #142971000119102 | Encephalopathy due to H1N1 influenza                 |
| ARI-InfluenzaLikellness | #16311000119108  | Pneumonia due to influenza                           |
| ARI-InfluenzaLikellness | #194946005       | Acute myocarditis - influenzal                       |
| ARI-InfluenzaLikellness | #195878008       | Pneumonia and influenza                              |
| ARI-InfluenzaLikellness | #195923003       | Influenza with laryngitis                            |
| ARI-InfluenzaLikellness | #195924009       | Influenza with pharyngitis                           |
| ARI-InfluenzaLikellness | #195929004       | Influenza with gastrointestinal tract involvement    |
| ARI-InfluenzaLikellness | #24662006        | Influenza due to Influenza B virus                   |
| ARI-InfluenzaLikellness | #309789002       | Encephalitis due to influenza                        |
| ARI-InfluenzaLikellness | #328531000119104 | Upper respiratory tract infection due to Influenza A |
| ARI-InfluenzaLikellness | #41269000        | Influenzal bronchopneumonia                          |
| ARI-InfluenzaLikellness | #43692000        | Influenzal acute upper respiratory infection         |
| ARI-InfluenzaLikellness | #442438000       | Influenza due to Influenza A virus                   |
| ARI-InfluenzaLikellness | #442696006       | Influenza due to Influenza A virus subtype H1N1      |
| ARI-InfluenzaLikellness | #450715004       | Influenza due to Influenza A virus subtype H7        |
| ARI-InfluenzaLikellness | #450716003       | Influenza due to Influenza A virus subtype H9        |
| ARI-InfluenzaLikellness | #6142004         | Influenza                                            |
| ARI-InfluenzaLikellness | #61700007        | Influenza with non-respiratory manifestation         |
| ARI-InfluenzaLikellness | #707448003       | Influenza due to Influenza A virus subtype H7N9      |
| ARI-InfluenzaLikellness | #713083002       | Influenza caused by Influenza A virus subtype H5     |
| ARI-InfluenzaLikellness | #719590007       | Influenza caused by seasonal influenza virus         |
| ARI-InfluenzaLikellness | #719865001       | Influenza caused by pandemic influenza virus         |
| ARI-InfluenzaLikellness | #738276008       | Influenza with CNS disorder                          |
| ARI-InfluenzaLikellness | #74644004        | Influenza with encephalopathy                        |
| ARI-InfluenzaLikellness | #772810003       | Influenza caused by Influenza A virus subtype H3N2   |
| ARI-InfluenzaLikellness | #772828001       | Influenza caused by Influenza A virus subtype H5N1   |
| ARI-InfluenzaLikellness | #772839003       | Pneumonia caused by Influenza A virus                |
| ARI-InfluenzaLikellness | #78046005        | Myocarditis due to influenza virus                   |
| ARI-InfluenzaLikellness | #81524006        | Influenza due to Influenza C virus                   |
| ARI-InfluenzaLikellness | #866126000       | Myelitis caused by Influenza A virus                 |
| ARI-InfluenzaLikellness | #95891005        | Influenza-like illness                               |
| ARI-Croup               | #22951000119104  | Recurrent croup                                      |
| ARI-Croup               | #275495004       | Acute fibrinous laryngotracheobronchitis             |
| ARI-Croup               | #35377009        | Parainfluenza virus laryngotracheobronchitis         |
| ARI-Croup               | #71186008        | Croup                                                |
| ARI-Croup               | #71255007        | Adenoviral laryngotracheobronchitis                  |



|               |                    |                                                                       |
|---------------|--------------------|-----------------------------------------------------------------------|
| ARI-Croup     | #72204002          | Respiratory syncytial virus laryngotracheobronchitis                  |
| ARI-Croup     | #73414003          | Haemophilus influenzae laryngotracheobronchitis                       |
| ARI-Croup     | #85915003          | Laryngotracheobronchitis                                              |
| ARI-Croup     | #897121000000109   | Westley Croup Score                                                   |
| ARI-Croup     | #897141000000102   | Assessment using Westley Croup Score                                  |
| ARI-Croup     | #897151000000104   | Westley Croup Score                                                   |
| ARI-Pneumonia | #1010615002        | Late syphilis of lung                                                 |
| ARI-Pneumonia | #1010620002        | Infection of lung caused by Mycobacterium malmoense                   |
| ARI-Pneumonia | #1010622005        | Infection of lung caused by Mycobacterium xenopi                      |
| ARI-Pneumonia | #1010634002        | Pneumonia caused by Acinetobacter                                     |
| ARI-Pneumonia | #1010662009        | Infection of lung caused by Mycobacterium kansasii                    |
| ARI-Pneumonia | #1033111000000104  | Influenza with pneumonia due to seasonal influenza virus              |
| ARI-Pneumonia | #10624991000119103 | Bronchopneumonia due to Achromobacter                                 |
| ARI-Pneumonia | #10625031000119102 | Bronchopneumonia due to anaerobic bacteria                            |
| ARI-Pneumonia | #10625071000119104 | Bronchopneumonia due to bacteria                                      |
| ARI-Pneumonia | #10625111000119106 | Bronchopneumonia due to Escherichia coli                              |
| ARI-Pneumonia | #10625151000119107 | Bronchopneumonia due to Group A Streptococcus                         |
| ARI-Pneumonia | #10625191000119102 | Bronchopneumonia due to Group B Streptococcus                         |
| ARI-Pneumonia | #10625231000119106 | Bronchopneumonia due to Haemophilus influenzae                        |
| ARI-Pneumonia | #10625271000119109 | Bronchopneumonia due to Human metapneumovirus                         |
| ARI-Pneumonia | #10625311000119109 | Bronchopneumonia due to Klebsiella pneumoniae                         |
| ARI-Pneumonia | #10625351000119105 | Bronchopneumonia due to methicillin resistant Staphylococcus aureus   |
| ARI-Pneumonia | #10625391000119100 | Bronchopneumonia due to methicillin susceptible Staphylococcus aureus |
| ARI-Pneumonia | #10625431000119105 | Bronchopneumonia due to Mycoplasma pneumoniae                         |
| ARI-Pneumonia | #10625471000119108 | Bronchopneumonia due to Proteus mirabilis                             |
| ARI-Pneumonia | #10625511000119104 | Bronchopneumonia due to Pseudomonas                                   |
| ARI-Pneumonia | #10625551000119103 | Bronchopneumonia due to respiratory syncytial virus                   |
| ARI-Pneumonia | #10625591000119108 | Bronchopneumonia due to Staphylococcus                                |
| ARI-Pneumonia | #10625631000119108 | Bronchopneumonia due to Staphylococcus aureus                         |
| ARI-Pneumonia | #10625671000119106 | Bronchopneumonia due to Streptococcus                                 |
| ARI-Pneumonia | #10625711000119105 | Bronchopneumonia due to Streptococcus pneumoniae                      |
| ARI-Pneumonia | #10625751000119106 | Bronchopneumonia due to virus                                         |
| ARI-Pneumonia | #1087061000119106  | Gonococcal pneumonia                                                  |

|               |                   |                                                                    |
|---------------|-------------------|--------------------------------------------------------------------|
| ARI-Pneumonia | #1092361000119109 | Rubella pneumonia                                                  |
| ARI-Pneumonia | #1092951000119106 | Pneumonia due to Bordetella parapertussis                          |
| ARI-Pneumonia | #1149093006       | Pneumonia caused by vancomycin resistant Enterococcus              |
| ARI-Pneumonia | #1176988004       | Enterobacter pneumonia                                             |
| ARI-Pneumonia | #1187256004       | Viral pneumonia due to Epstein-Barr virus infectious mononucleosis |
| ARI-Pneumonia | #120639003        | Hantavirus pulmonary syndrome                                      |
| ARI-Pneumonia | #1208602000       | Pneumonia caused by Pseudomonas aeruginosa                         |
| ARI-Pneumonia | #123587001        | Acute bronchopneumonia                                             |
| ARI-Pneumonia | #123588006        | Confluent bronchopneumonia with abscess formation                  |
| ARI-Pneumonia | #123589003        | Necrotising bronchopneumonia                                       |
| ARI-Pneumonia | #123590007        | Focal pneumonia                                                    |
| ARI-Pneumonia | #123591006        | Confluent pneumonia                                                |
| ARI-Pneumonia | #124691000119101  | Pneumonia due to methicillin resistant Staphylococcus aureus       |
| ARI-Pneumonia | #12571000132104   | Pneumonitis due to Herpes zoster                                   |
| ARI-Pneumonia | #128711000119106  | Pneumonia due to methicillin susceptible Staphylococcus aureus     |
| ARI-Pneumonia | #142931000119100  | Pneumonia due to H1N1 influenza                                    |
| ARI-Pneumonia | #16311000119108   | Pneumonia due to influenza                                         |
| ARI-Pneumonia | #1731000119106    | Atypical mycobacterial infection of lung                           |
| ARI-Pneumonia | #181007           | Haemorrhagic bronchopneumonia                                      |
| ARI-Pneumonia | #186342000        | Pulmonary Mycobacterium avium complex infection                    |
| ARI-Pneumonia | #191727003        | Post measles pneumonia                                             |
| ARI-Pneumonia | #195878008        | Pneumonia and influenza                                            |
| ARI-Pneumonia | #195881003        | Pneumonia due to respiratory syncytial virus                       |
| ARI-Pneumonia | #195886008        | Group B streptococcal pneumonia                                    |
| ARI-Pneumonia | #195888009        | Proteus pneumonia                                                  |
| ARI-Pneumonia | #195889001        | Legionella pneumonia                                               |
| ARI-Pneumonia | #195896004        | Pneumonia due to pleuropneumonia-like organism                     |
| ARI-Pneumonia | #195900001        | Pneumonia due to measles                                           |
| ARI-Pneumonia | #195902009        | Anthrax pneumonia                                                  |
| ARI-Pneumonia | #195908008        | Actinomycotic pneumonia                                            |
| ARI-Pneumonia | #195909000        | Nocardial pneumonia                                                |
| ARI-Pneumonia | #195911009        | Chickenpox pneumonia                                               |
| ARI-Pneumonia | #196112005        | Abscess of lung with pneumonia                                     |
| ARI-Pneumonia | #2087000          | Pulmonary nocardiosis                                              |
| ARI-Pneumonia | #21846001         | Pulmonary actinomycosis                                            |
| ARI-Pneumonia | #22754005         | Staphylococcal pneumonia                                           |
| ARI-Pneumonia | #233604007        | Pneumonia                                                          |
| ARI-Pneumonia | #233606009        | Atypical pneumonia                                                 |
| ARI-Pneumonia | #233607000        | Pneumococcal pneumonia                                             |
| ARI-Pneumonia | #233608005        | Meningococcal pneumonia                                            |

|               |            |                                                                    |
|---------------|------------|--------------------------------------------------------------------|
| ARI-Pneumonia | #233609002 | Chlamydial pneumonia                                               |
| ARI-Pneumonia | #233617005 | Haemorrhagic pneumonia                                             |
| ARI-Pneumonia | #233618000 | Mycobacterial pneumonia                                            |
| ARI-Pneumonia | #233621003 | Rickettsial pneumonia                                              |
| ARI-Pneumonia | #233623000 | Mononuclear interstitial pneumonia                                 |
| ARI-Pneumonia | #233624006 | Herpes simplex pneumonia                                           |
| ARI-Pneumonia | #240387006 | Pulmonary glanders                                                 |
| ARI-Pneumonia | #2523007   | Salmonella pneumonia                                               |
| ARI-Pneumonia | #266350000 | Pneumococcal lobar pneumonia                                       |
| ARI-Pneumonia | #277869007 | Non-tuberculous mycobacterial pneumonia                            |
| ARI-Pneumonia | #278516003 | Lobar pneumonia                                                    |
| ARI-Pneumonia | #300999006 | Basal pneumonia                                                    |
| ARI-Pneumonia | #301000005 | Left lower zone pneumonia                                          |
| ARI-Pneumonia | #301001009 | Right lower zone pneumonia                                         |
| ARI-Pneumonia | #301002002 | Left upper zone pneumonia                                          |
| ARI-Pneumonia | #301003007 | Right middle zone pneumonia                                        |
| ARI-Pneumonia | #301004001 | Right upper zone pneumonia                                         |
| ARI-Pneumonia | #308906005 | Secondary bacterial pneumonia                                      |
| ARI-Pneumonia | #312342009 | Infective pneumonia                                                |
| ARI-Pneumonia | #31561003  | Hypostatic bronchopneumonia                                        |
| ARI-Pneumonia | #31920006  | Haemorrhagic varicella pneumonitis                                 |
| ARI-Pneumonia | #32204007  | Pulmonary actinobacillosis                                         |
| ARI-Pneumonia | #32286006  | Pneumonia in Q fever                                               |
| ARI-Pneumonia | #34020007  | Pneumonia due to Streptococcus                                     |
| ARI-Pneumonia | #35037009  | Primary atypical interstitial pneumonia                            |
| ARI-Pneumonia | #35339003  | Primary pneumonic plague                                           |
| ARI-Pneumonia | #371072008 | Postobstructive pneumonia                                          |
| ARI-Pneumonia | #373435003 | Batley disease                                                     |
| ARI-Pneumonia | #385093006 | Community acquired pneumonia                                       |
| ARI-Pneumonia | #38976008  | Pneumonic plague                                                   |
| ARI-Pneumonia | #39172002  | Pneumonia due to Proteus mirabilis                                 |
| ARI-Pneumonia | #396285007 | Bronchopneumonia                                                   |
| ARI-Pneumonia | #396286008 | Bilateral bronchopneumonia                                         |
| ARI-Pneumonia | #406595002 | Infection due to Mycoplasma pneumoniae                             |
| ARI-Pneumonia | #407671000 | Bilateral pneumonia                                                |
| ARI-Pneumonia | #409664000 | Pneumonia due to anaerobic bacteria                                |
| ARI-Pneumonia | #409665004 | Pneumonia due to aerobic bacteria                                  |
| ARI-Pneumonia | #41207000  | Adenoviral pneumonia                                               |
| ARI-Pneumonia | #41269000  | Influenzal bronchopneumonia                                        |
| ARI-Pneumonia | #41381004  | Pneumonia due to Pseudomonas                                       |
| ARI-Pneumonia | #420544002 | Bacterial pneumonia with AIDS (acquired immunodeficiency syndrome) |

|               |            |                                                                              |
|---------------|------------|------------------------------------------------------------------------------|
| ARI-Pneumonia | #420787001 | Pneumococcal pneumonia with AIDS (acquired immunodeficiency syndrome)        |
| ARI-Pneumonia | #421508002 | Viral pneumonia with AIDS (acquired immunodeficiency syndrome)               |
| ARI-Pneumonia | #421671002 | Pneumonia with AIDS (acquired immunodeficiency syndrome)                     |
| ARI-Pneumonia | #425996009 | Bilateral basal pneumonia                                                    |
| ARI-Pneumonia | #426696003 | Lingular pneumonia                                                           |
| ARI-Pneumonia | #429271009 | Ventilator associated pneumonia                                              |
| ARI-Pneumonia | #430395005 | Pneumonia due to Gram negative bacteria                                      |
| ARI-Pneumonia | #440990006 | Mycoplasma pneumoniae present                                                |
| ARI-Pneumonia | #441590008 | Pneumonia due to Severe acute respiratory syndrome coronavirus               |
| ARI-Pneumonia | #441658007 | Pneumonia due to Staphylococcus aureus                                       |
| ARI-Pneumonia | #441942006 | Pneumonia due to infection by Streptococcus pyogenes                         |
| ARI-Pneumonia | #445096001 | Pneumonia due to Human metapneumovirus                                       |
| ARI-Pneumonia | #446543007 | Tuberculous abscess of lung                                                  |
| ARI-Pneumonia | #45312009  | Pneumonia in typhoid fever                                                   |
| ARI-Pneumonia | #45556008  | Pulmonary tularaemia                                                         |
| ARI-Pneumonia | #46970008  | Mycoplasma pneumonia                                                         |
| ARI-Pneumonia | #471272001 | Cavitary pneumonia                                                           |
| ARI-Pneumonia | #50804000  | Catarrhal pneumonia                                                          |
| ARI-Pneumonia | #51530003  | Pneumonia due to Escherichia coli                                            |
| ARI-Pneumonia | #53084003  | Bacterial pneumonia                                                          |
| ARI-Pneumonia | #55679008  | Peribronchial pneumonia                                                      |
| ARI-Pneumonia | #57702005  | Unresolved pneumonia                                                         |
| ARI-Pneumonia | #58890000  | Adenoviral bronchopneumonia                                                  |
| ARI-Pneumonia | #59475000  | Pneumonia in pertussis                                                       |
| ARI-Pneumonia | #60485005  | Pleurobronchopneumonia                                                       |
| ARI-Pneumonia | #61884008  | Achromobacter pneumonia                                                      |
| ARI-Pneumonia | #64479007  | Pneumonia due to Klebsiella pneumoniae                                       |
| ARI-Pneumonia | #64667001  | Interstitial pneumonia                                                       |
| ARI-Pneumonia | #64703005  | Terminal bronchopneumonia                                                    |
| ARI-Pneumonia | #64880000  | Parainfluenza virus bronchopneumonia                                         |
| ARI-Pneumonia | #64917006  | Parainfluenza virus pneumonia                                                |
| ARI-Pneumonia | #66429007  | Unresolved lobar pneumonia                                                   |
| ARI-Pneumonia | #67525007  | Secondary pneumonic plague                                                   |
| ARI-Pneumonia | #68409003  | Organised pneumonia                                                          |
| ARI-Pneumonia | #70036007  | Haemophilus influenzae pneumonia                                             |
| ARI-Pneumonia | #7063008   | Gangrenous pneumonia                                                         |
| ARI-Pneumonia | #713084008 | Pneumonia caused by Human coronavirus                                        |
| ARI-Pneumonia | #713544008 | Bacterial pneumonia co-occurrent with human immunodeficiency virus infection |

|               |                     |                                                                                             |
|---------------|---------------------|---------------------------------------------------------------------------------------------|
| ARI-Pneumonia | #724498004          | Pneumonia caused by Chlamydia pneumoniae                                                    |
| ARI-Pneumonia | #72656004           | Granulomatous pneumonia                                                                     |
| ARI-Pneumonia | #733051000          | Pneumonia caused by Gram positive bacteria                                                  |
| ARI-Pneumonia | #75570004           | Viral pneumonia                                                                             |
| ARI-Pneumonia | #76090006           | Pittsburgh pneumonia                                                                        |
| ARI-Pneumonia | #763888005          | Necrotising pneumonia caused by Panton-Valentine leukocidin producing Staphylococcus aureus |
| ARI-Pneumonia | #7678002            | Cytomegaloviral pneumonia                                                                   |
| ARI-Pneumonia | #772166001          | Legionella pneumonia suspected                                                              |
| ARI-Pneumonia | #772839003          | Pneumonia caused by Influenza A virus                                                       |
| ARI-Pneumonia | #81164001           | Ornithosis with pneumonia                                                                   |
| ARI-Pneumonia | #84353005           | Pulmonary disease due to Mycobacteria                                                       |
| ARI-Pneumonia | #85469005           | Hypostatic pneumonia                                                                        |
| ARI-Pneumonia | #8555001            | Syphilis of lung                                                                            |
| ARI-Pneumonia | #882784691000119100 | Pneumonia caused by SARS-CoV-2 (severe acute respiratory syndrome coronavirus 2)            |
| ARI-Pneumonia | #95436008           | Lung consolidation                                                                          |
| ARI-Sinusitis | #111274000          | Acute abscess of nasal sinus                                                                |
| ARI-Sinusitis | #11134001           | Acute suppuration of sphenoidal sinus                                                       |
| ARI-Sinusitis | #13266007           | Sphenoidal sinusitis                                                                        |
| ARI-Sinusitis | #15805002           | Acute sinusitis                                                                             |
| ARI-Sinusitis | #16036000           | Acute empyema of frontal sinus                                                              |
| ARI-Sinusitis | #17357005           | Acute suppuration of frontal sinus                                                          |
| ARI-Sinusitis | #18643000           | Ethmoidal sinusitis                                                                         |
| ARI-Sinusitis | #195790000          | Pansinusitis                                                                                |
| ARI-Sinusitis | #232390009          | Suppurative sinusitis with complications                                                    |
| ARI-Sinusitis | #23884004           | Acute suppuration of maxillary sinus                                                        |
| ARI-Sinusitis | #25764005           | Acute abscess of frontal sinus                                                              |
| ARI-Sinusitis | #27278006           | Acute empyema of sphenoidal sinus                                                           |
| ARI-Sinusitis | #30239003           | Acute abscess of sphenoidal sinus                                                           |
| ARI-Sinusitis | #35168006           | Acute empyema of ethmoidal sinus                                                            |
| ARI-Sinusitis | #36971009           | Sinusitis                                                                                   |
| ARI-Sinusitis | #371127003          | Obstructive sinusitis                                                                       |
| ARI-Sinusitis | #431231008          | Acute rhinosinusitis                                                                        |
| ARI-Sinusitis | #444814009          | Viral sinusitis                                                                             |
| ARI-Sinusitis | #5028002            | Acute pansinusitis                                                                          |
| ARI-Sinusitis | #58763001           | Acute empyema of nasal sinus                                                                |
| ARI-Sinusitis | #61711004           | Acute abscess of ethmoidal sinus                                                            |
| ARI-Sinusitis | #63140003           | Acute suppuration of ethmoidal sinus                                                        |
| ARI-Sinusitis | #67832005           | Acute ethmoidal sinusitis                                                                   |
| ARI-Sinusitis | #68272006           | Acute maxillary sinusitis                                                                   |
| ARI-Sinusitis | #703470001          | Bacterial sinusitis                                                                         |

|                            |            |                                              |
|----------------------------|------------|----------------------------------------------|
| ARI-Sinusitis              | #721741006 | Sinusitis caused by Streptococcus pneumoniae |
| ARI-Sinusitis              | #721755003 | Sinusitis caused by Haemophilus influenzae   |
| ARI-Sinusitis              | #725917007 | Acute sinusitis caused by virus              |
| ARI-Sinusitis              | #75498004  | Acute bacterial sinusitis                    |
| ARI-Sinusitis              | #76653009  | Acute empyema of maxillary sinus             |
| ARI-Sinusitis              | #77919000  | Acute sphenoidal sinusitis                   |
| ARI-Sinusitis              | #78737005  | Frontal sinusitis                            |
| ARI-Sinusitis              | #80600003  | Acute suppuration of nasal sinus             |
| ARI-Sinusitis              | #88348008  | Maxillary sinusitis                          |
| ARI-Sinusitis              | #89194009  | Acute abscess of maxillary sinus             |
| ARI-Sinusitis              | #897656009 | Rhinosinusitis                               |
| ARI-Sinusitis              | #91038008  | Acute frontal sinusitis                      |
| ARI-TonsillitisPharyngitis | #10351008  | Suppurative tonsillitis                      |
| ARI-TonsillitisPharyngitis | #111816002 | Pneumococcal tonsillitis                     |
| ARI-TonsillitisPharyngitis | #11461005  | Staphylococcal tonsillitis                   |
| ARI-TonsillitisPharyngitis | #126664009 | Exudative pharyngitis                        |
| ARI-TonsillitisPharyngitis | #126665005 | Oropharyngeal mucositis                      |
| ARI-TonsillitisPharyngitis | #14465002  | Ulcerative tonsillitis                       |
| ARI-TonsillitisPharyngitis | #1532007   | Viral pharyngitis                            |
| ARI-TonsillitisPharyngitis | #17741008  | Acute tonsillitis                            |
| ARI-TonsillitisPharyngitis | #186659004 | Herpangina                                   |
| ARI-TonsillitisPharyngitis | #186675001 | Viral pharyngoconjunctivitis                 |
| ARI-TonsillitisPharyngitis | #186963008 | Vincent's angina                             |
| ARI-TonsillitisPharyngitis | #195655000 | Acute gangrenous pharyngitis                 |
| ARI-TonsillitisPharyngitis | #195656004 | Acute phlegmonous pharyngitis                |
| ARI-TonsillitisPharyngitis | #195657008 | Acute ulcerative pharyngitis                 |
| ARI-TonsillitisPharyngitis | #195658003 | Acute bacterial pharyngitis                  |
| ARI-TonsillitisPharyngitis | #195659006 | Acute pneumococcal pharyngitis               |
| ARI-TonsillitisPharyngitis | #195660001 | Acute staphylococcal pharyngitis             |
| ARI-TonsillitisPharyngitis | #195662009 | Acute viral pharyngitis                      |
| ARI-TonsillitisPharyngitis | #195666007 | Acute erythematous tonsillitis               |
| ARI-TonsillitisPharyngitis | #195667003 | Acute follicular tonsillitis                 |
| ARI-TonsillitisPharyngitis | #195668008 | Acute ulcerative tonsillitis                 |
| ARI-TonsillitisPharyngitis | #195669000 | Acute catarrhal tonsillitis                  |
| ARI-TonsillitisPharyngitis | #195670004 | Acute gangrenous tonsillitis                 |
| ARI-TonsillitisPharyngitis | #195671000 | Acute bacterial tonsillitis                  |
| ARI-TonsillitisPharyngitis | #195672007 | Acute pneumococcal tonsillitis               |
| ARI-TonsillitisPharyngitis | #195673002 | Acute staphylococcal tonsillitis             |
| ARI-TonsillitisPharyngitis | #195676005 | Acute viral tonsillitis                      |
| ARI-TonsillitisPharyngitis | #195709006 | Pharyngolaryngitis                           |
| ARI-TonsillitisPharyngitis | #195804009 | Lingual tonsillitis                          |
| ARI-TonsillitisPharyngitis | #195924009 | Influenza with pharyngitis                   |
| ARI-TonsillitisPharyngitis | #232399005 | Acute herpes simplex pharyngitis             |

|                            |                    |                                                          |
|----------------------------|--------------------|----------------------------------------------------------|
| ARI-TonsillitisPharyngitis | #232400003         | Acute herpes zoster pharyngitis                          |
| ARI-TonsillitisPharyngitis | #232401004         | Glandular fever pharyngitis                              |
| ARI-TonsillitisPharyngitis | #232402006         | Meningococcal pharyngitis                                |
| ARI-TonsillitisPharyngitis | #232403001         | Chlamydial pharyngitis                                   |
| ARI-TonsillitisPharyngitis | #232417005         | Vincent's tonsillitis                                    |
| ARI-TonsillitisPharyngitis | #234528007         | Nasopharyngeal sarcoidosis                               |
| ARI-TonsillitisPharyngitis | #240444009         | Fusobacterial necrotising tonsillitis                    |
| ARI-TonsillitisPharyngitis | #240547000         | Lymphonodular coxsackie pharyngitis                      |
| ARI-TonsillitisPharyngitis | #27878001          | Follicular tonsillitis                                   |
| ARI-TonsillitisPharyngitis | #302911003         | Acute lingual tonsillitis                                |
| ARI-TonsillitisPharyngitis | #312422001         | Infective pharyngitis                                    |
| ARI-TonsillitisPharyngitis | #31309002          | Respiratory syncytial virus pharyngitis                  |
| ARI-TonsillitisPharyngitis | #363746003         | Acute pharyngitis                                        |
| ARI-TonsillitisPharyngitis | #39271004          | Ulcerative pharyngitis                                   |
| ARI-TonsillitisPharyngitis | #405737000         | Pharyngitis                                              |
| ARI-TonsillitisPharyngitis | #40766000          | Enteroviral lymphonodular pharyngitis                    |
| ARI-TonsillitisPharyngitis | #415724006         | Tonsillitis due to Gram negative bacteria                |
| ARI-TonsillitisPharyngitis | #41582007          | Streptococcal tonsillitis                                |
| ARI-TonsillitisPharyngitis | #43878008          | Streptococcal sore throat                                |
| ARI-TonsillitisPharyngitis | #51209006          | Viral tonsillitis                                        |
| ARI-TonsillitisPharyngitis | #51476001          | Nasopharyngitis                                          |
| ARI-TonsillitisPharyngitis | #55355000          | Acute laryngopharyngitis                                 |
| ARI-TonsillitisPharyngitis | #58031004          | Suppurative pharyngitis                                  |
| ARI-TonsillitisPharyngitis | #59221008          | Parainfluenza virus rhinopharyngitis                     |
| ARI-TonsillitisPharyngitis | #59471009          | Phlegmonous pharyngitis                                  |
| ARI-TonsillitisPharyngitis | #652005            | Gangrenous tonsillitis                                   |
| ARI-TonsillitisPharyngitis | #703468005         | Bacterial tonsillitis                                    |
| ARI-TonsillitisPharyngitis | #70385007          | Adenoviral pharyngoconjunctivitis                        |
| ARI-TonsillitisPharyngitis | #721586007         | Pharyngotonsillitis caused by Human herpes simplex virus |
| ARI-TonsillitisPharyngitis | #72430001          | Gangrenous pharyngitis                                   |
| ARI-TonsillitisPharyngitis | #76651006          | Pneumococcal pharyngitis                                 |
| ARI-TonsillitisPharyngitis | #78430008          | Adenoviral pharyngitis                                   |
| ARI-TonsillitisPharyngitis | #78911000          | Parainfluenza virus pharyngitis                          |
| ARI-TonsillitisPharyngitis | #82228008          | Staphylococcal pharyngitis                               |
| ARI-TonsillitisPharyngitis | #878818001         | Pharyngotonsillitis                                      |
| ARI-TonsillitisPharyngitis | #90176007          | Tonsillitis                                              |
| ARI-TonsillitisPharyngitis | #95885008          | Mycoplasmal pharyngitis                                  |
| ARI-OtitisMedia            | #10624911000119107 | Otitis media due to H1N1 influenza                       |
| ARI-OtitisMedia            | #10624951000119108 | Otitis media due to influenza                            |
| ARI-OtitisMedia            | #10674911000119108 | Otitis media due to Influenza A virus                    |
| ARI-OtitisMedia            | #1089341000119100  | Otitis media of left ear                                 |
| ARI-OtitisMedia            | #1090001000119105  | Otitis media due to scarlet fever                        |
| ARI-OtitisMedia            | #1091951000119104  | Otitis media of right ear                                |

|                 |                   |                                                                                                    |
|-----------------|-------------------|----------------------------------------------------------------------------------------------------|
| ARI-OtitisMedia | #1240521000000100 | Otitis media due to disease caused by SARS-CoV-2 (severe acute respiratory syndrome coronavirus 2) |
| ARI-OtitisMedia | #14852000         | Myringitis                                                                                         |
| ARI-OtitisMedia | #14948001         | Acute suppurative otitis media without spontaneous rupture of ear drum                             |
| ARI-OtitisMedia | #16664009         | Malignant otitis media                                                                             |
| ARI-OtitisMedia | #19021002         | Haemophilus influenzae otitis media                                                                |
| ARI-OtitisMedia | #19399000         | Acute exudative otitis media                                                                       |
| ARI-OtitisMedia | #194268005        | Acute eustachian tube salpingitis                                                                  |
| ARI-OtitisMedia | #194281003        | Acute suppurative otitis media                                                                     |
| ARI-OtitisMedia | #194286008        | Bilateral suppurative otitis media                                                                 |
| ARI-OtitisMedia | #194288009        | Acute left otitis media                                                                            |
| ARI-OtitisMedia | #194289001        | Acute right otitis media                                                                           |
| ARI-OtitisMedia | #194290005        | Acute bilateral otitis media                                                                       |
| ARI-OtitisMedia | #194311006        | Acute myringitis without otitis media                                                              |
| ARI-OtitisMedia | #232245002        | Granular myringitis                                                                                |
| ARI-OtitisMedia | #270490007        | Acute otitis media with effusion                                                                   |
| ARI-OtitisMedia | #270491006        | Eustachian tube salpingitis                                                                        |
| ARI-OtitisMedia | #28795002         | Subacute exudative otitis media                                                                    |
| ARI-OtitisMedia | #29350000         | Catarrhal otitis media                                                                             |
| ARI-OtitisMedia | #297009           | Acute myringitis                                                                                   |
| ARI-OtitisMedia | #3110003          | Acute otitis media                                                                                 |
| ARI-OtitisMedia | #312218008        | Infective otitis media                                                                             |
| ARI-OtitisMedia | #32760002         | Exudative otitis media                                                                             |
| ARI-OtitisMedia | #33528003         | Bullous myringitis                                                                                 |
| ARI-OtitisMedia | #360595002        | Acute necrotising otitis media                                                                     |
| ARI-OtitisMedia | #39288006         | Purulent otitis media                                                                              |
| ARI-OtitisMedia | #445172009        | Cholesterol granuloma of middle ear and mastoid                                                    |
| ARI-OtitisMedia | #65363002         | Otitis media                                                                                       |
| ARI-OtitisMedia | #703469002        | Bacterial otitis media                                                                             |
| ARI-OtitisMedia | #721742004        | Otitis media caused by Streptococcus pneumoniae                                                    |
| ARI-OtitisMedia | #7271000119107    | Acute bilateral otitis media with effusion                                                         |
| ARI-OtitisMedia | #7361000119105    | Perforation of tympanic membrane due to otitis media                                               |
| ARI-OtitisMedia | #84261000119106   | Acute persistent otitis media                                                                      |
| ARI-OtitisMedia | #85108007         | Acute tubotympanic catarrh                                                                         |
| ARI-OtitisMedia | #86279000         | Acute suppurative otitis media with spontaneous rupture of ear drum                                |
| ARI-OtitisMedia | #89145009         | Subacute tubotympanic catarrh                                                                      |
| ARI-Bronchitis  | #10509002         | Acute bronchitis                                                                                   |
| ARI-Bronchitis  | #111849006        | Adenoviral bronchitis                                                                              |
| ARI-Bronchitis  | #1163489008       | Human metapneumovirus bronchitis                                                                   |
| ARI-Bronchitis  | #13617004         | Tracheobronchitis                                                                                  |



|                |                     |                                                                                         |
|----------------|---------------------|-----------------------------------------------------------------------------------------|
| ARI-Bronchitis | #138389411000119105 | Acute bronchitis caused by SARS-CoV-2 (severe acute respiratory syndrome coronavirus 2) |
| ARI-Bronchitis | #16146001           | Viral bronchitis                                                                        |
| ARI-Bronchitis | #195714005          | Acute fibrinous bronchitis                                                              |
| ARI-Bronchitis | #195717003          | Acute purulent bronchitis                                                               |
| ARI-Bronchitis | #195719000          | Acute pneumococcal bronchitis                                                           |
| ARI-Bronchitis | #195720006          | Acute streptococcal bronchitis                                                          |
| ARI-Bronchitis | #195721005          | Acute bronchitis caused by Haemophilus influenzae                                       |
| ARI-Bronchitis | #195722003          | Acute Moraxella catarrhalis bronchitis                                                  |
| ARI-Bronchitis | #195725001          | Acute coxsackievirus bronchitis                                                         |
| ARI-Bronchitis | #195726000          | Acute parainfluenza virus bronchitis                                                    |
| ARI-Bronchitis | #195727009          | Acute respiratory syncytial virus bronchitis                                            |
| ARI-Bronchitis | #195728004          | Acute bronchitis due to rhinovirus                                                      |
| ARI-Bronchitis | #195729007          | Acute echovirus bronchitis                                                              |
| ARI-Bronchitis | #233598009          | Acute bacterial bronchitis                                                              |
| ARI-Bronchitis | #233599001          | Acute mycoplasmal bronchitis                                                            |
| ARI-Bronchitis | #233600003          | Acute chlamydial bronchitis                                                             |
| ARI-Bronchitis | #233601004          | Acute viral bronchitis                                                                  |
| ARI-Bronchitis | #233799004          | Acute toxic tracheobronchitis                                                           |
| ARI-Bronchitis | #27475006           | Parainfluenza virus bronchitis                                                          |
| ARI-Bronchitis | #29591002           | Purulent bronchitis                                                                     |
| ARI-Bronchitis | #312371005          | Acute infective bronchitis                                                              |
| ARI-Bronchitis | #312400008          | Acute infective tracheobronchitis                                                       |
| ARI-Bronchitis | #32398004           | Bronchitis                                                                              |
| ARI-Bronchitis | #35301006           | Acute tracheobronchitis                                                                 |
| ARI-Bronchitis | #405944004          | Asthmatic bronchitis                                                                    |
| ARI-Bronchitis | #40600002           | Pneumococcal bronchitis                                                                 |
| ARI-Bronchitis | #5875001            | Acute bronchitis with obstruction                                                       |
| ARI-Bronchitis | #65878001           | Septic bronchitis                                                                       |
| ARI-Bronchitis | #714203003          | Acute bronchitis co-occurrent with bronchiectasis                                       |
| ARI-Bronchitis | #785728005          | Bronchitis co-occurrent with wheeze                                                     |
| ARI-Bronchitis | #785737005          | Bronchitis co-occurrent with chronic wheeze                                             |
| ARI-Bronchitis | #785744001          | Bronchitis co-occurrent with acute wheeze                                               |
| ARI-Bronchitis | #785745000          | Acute bronchitis co-occurrent with wheeze                                               |
| ARI-Bronchitis | #79479005           | Respiratory syncytial virus bronchitis                                                  |
| ARI-Bronchitis | #80257001           | Acute bronchitis with bronchospasm                                                      |
| ARI-Bronchitis | #89549007           | Catarrhal bronchitis                                                                    |
| ARI-Bronchitis | #95886009           | Mycoplasma tracheobronchitis                                                            |
| ARI-URTI-NOS   | #162388002          | Has a sore throat                                                                       |
| ARI-URTI-NOS   | #162397003          | Pain in throat                                                                          |
| ARI-URTI-NOS   | #267102003          | Sore throat                                                                             |

|                   |                    |                                                        |
|-------------------|--------------------|--------------------------------------------------------|
| ARI-URTI-NOS      | #281794004         | Viral upper respiratory tract infection                |
| ARI-URTI-NOS      | #54150009          | Upper respiratory infection                            |
| ARI-URTI-NOS      | #54398005          | Acute upper respiratory infection                      |
| ARI-URTI-NOS      | #82272006          | Common cold                                            |
| ARI-Bronchiolitis | #10629191000119100 | Bronchiolitis caused by influenza virus                |
| ARI-Bronchiolitis | #13089009          | Adenoviral bronchiolitis                               |
| ARI-Bronchiolitis | #15199004          | Acute bronchiolitis with bronchospasm                  |
| ARI-Bronchiolitis | #195737004         | Acute exudative bronchiolitis                          |
| ARI-Bronchiolitis | #195739001         | Acute bronchiolitis due to respiratory syncytial virus |
| ARI-Bronchiolitis | #233602006         | Acute viral bronchiolitis                              |
| ARI-Bronchiolitis | #233603001         | Acute bronchiolitis due to adenovirus                  |
| ARI-Bronchiolitis | #4120002           | Bronchiolitis                                          |
| ARI-Bronchiolitis | #445102008         | Bronchiolitis due to Human metapneumovirus             |
| ARI-Bronchiolitis | #52409006          | Bronchiolitis exudativa                                |
| ARI-Bronchiolitis | #5505005           | Acute bronchiolitis                                    |
| ARI-Bronchiolitis | #57089007          | Respiratory syncytial virus bronchiolitis              |
| ARI-Bronchiolitis | #718004            | Acute bronchiolitis with obstruction                   |
| ARI-Bronchiolitis | #87695000          | Necrotising bronchiolitis                              |
| ARI-LRTI-NOS      | #128601007         | Infectious disease of lung                             |
| ARI-LRTI-NOS      | #161924005         | Productive cough -green sputum                         |
| ARI-LRTI-NOS      | #161925006         | Productive cough-yellow sputum                         |
| ARI-LRTI-NOS      | #162951005         | O/E - bronchial breathing                              |
| ARI-LRTI-NOS      | #195742007         | Acute lower respiratory tract infection                |
| ARI-LRTI-NOS      | #24816000          | Rusty sputum                                           |
| ARI-LRTI-NOS      | #248599002         | Copious sputum                                         |
| ARI-LRTI-NOS      | #248600004         | Moderate sputum                                        |
| ARI-LRTI-NOS      | #248605009         | Dirty sputum                                           |
| ARI-LRTI-NOS      | #271827002         | Sputum abnormal - colour                               |
| ARI-LRTI-NOS      | #274400006         | Pus in sputum O/E                                      |
| ARI-LRTI-NOS      | #275497007         | Infection of lower respiratory tract and mediastinum   |
| ARI-LRTI-NOS      | #277900008         | Grey sputum                                            |
| ARI-LRTI-NOS      | #277903005         | Thick sputum                                           |
| ARI-LRTI-NOS      | #277907006         | Yellow sputum                                          |
| ARI-LRTI-NOS      | #277908001         | Green sputum                                           |
| ARI-LRTI-NOS      | #277910004         | Brown sputum                                           |
| ARI-LRTI-NOS      | #28743005          | Productive cough                                       |
| ARI-LRTI-NOS      | #312119006         | Bacterial lower respiratory infection                  |
| ARI-LRTI-NOS      | #312134000         | Viral lower respiratory infection                      |
| ARI-LRTI-NOS      | #42192008          | Purulent sputum                                        |
| ARI-LRTI-NOS      | #50417007          | Lower respiratory tract infection                      |
| ARI-LRTI-NOS      | #79451004          | Bronchial breathing                                    |
| ARI-LRTI-NOS      | #860741000000100   | Dark green sputum                                      |
| ARI-LRTI-NOS      | #860761000000104   | Pale green sputum                                      |

|                        |                     |                                                                                                    |
|------------------------|---------------------|----------------------------------------------------------------------------------------------------|
| ARI-LRTI-NOS           | #880529761000119102 | Lower respiratory infection caused by SARS-CoV-2 (severe acute respiratory syndrome coronavirus 2) |
| ARI-LRTI-NOS           | #8955008            | Mucopurulent sputum                                                                                |
| ARI-AsthmaExacerbation | #10674711000119105  | Acute severe exacerbation of asthma co-occurrent with allergic rhinitis                            |
| ARI-AsthmaExacerbation | #10674791000119101  | Acute exacerbation of intermittent allergic asthma                                                 |
| ARI-AsthmaExacerbation | #10675471000119109  | Acute severe exacerbation of severe persistent allergic asthma                                     |
| ARI-AsthmaExacerbation | #10675551000119104  | Acute severe exacerbation of severe persistent asthma co-occurrent with allergic rhinitis          |
| ARI-AsthmaExacerbation | #10675911000119109  | Acute severe exacerbation of mild persistent allergic asthma                                       |
| ARI-AsthmaExacerbation | #10675991000119100  | Acute severe exacerbation of mild persistent allergic asthma co-occurrent with allergic rhinitis   |
| ARI-AsthmaExacerbation | #10676271000119104  | Acute exacerbation of moderate persistent allergic asthma                                          |
| ARI-AsthmaExacerbation | #10676431000119103  | Acute severe exacerbation of moderate persistent allergic asthma                                   |
| ARI-AsthmaExacerbation | #10676511000119109  | Acute severe exacerbation of moderate persistent asthma co-occurrent with allergic rhinitis        |
| ARI-AsthmaExacerbation | #10692721000119102  | Chronic obstructive asthma co-occurrent with acute exacerbation of asthma                          |
| ARI-AsthmaExacerbation | #1086701000000102   | Life threatening acute exacerbation of allergic asthma                                             |
| ARI-AsthmaExacerbation | #1086711000000100   | Life threatening acute exacerbation of intrinsic asthma                                            |
| ARI-AsthmaExacerbation | #1751000119100      | Acute exacerbation of chronic obstructive airways disease with asthma                              |
| ARI-AsthmaExacerbation | #281239006          | Acute asthma                                                                                       |
| ARI-AsthmaExacerbation | #425969006          | Exacerbation of intermittent asthma                                                                |
| ARI-AsthmaExacerbation | #442025000          | Acute exacerbation of chronic asthmatic bronchitis                                                 |
| ARI-AsthmaExacerbation | #707445000          | Exacerbation of mild persistent asthma                                                             |
| ARI-AsthmaExacerbation | #707446004          | Exacerbation of moderate persistent asthma                                                         |
| ARI-AsthmaExacerbation | #707447008          | Exacerbation of severe persistent asthma                                                           |
| ARI-AsthmaExacerbation | #707979007          | Acute severe exacerbation of severe persistent asthma                                              |
| ARI-AsthmaExacerbation | #707980005          | Acute severe exacerbation of moderate persistent asthma                                            |
| ARI-AsthmaExacerbation | #707981009          | Acute severe exacerbation of mild persistent asthma                                                |
| ARI-AsthmaExacerbation | #708090002          | Acute severe exacerbation of asthma                                                                |
| ARI-AsthmaExacerbation | #708093000          | Acute exacerbation of allergic asthma                                                              |
| ARI-AsthmaExacerbation | #708094006          | Acute exacerbation of intrinsic asthma                                                             |
| ARI-AsthmaExacerbation | #708095007          | Acute severe exacerbation of immunoglobulin E-mediated allergic asthma                             |
| ARI-AsthmaExacerbation | #708096008          | Acute severe exacerbation of intrinsic asthma                                                      |

|                        |                   |                                                                                                   |
|------------------------|-------------------|---------------------------------------------------------------------------------------------------|
| ARI-AsthmaExacerbation | #733858005        | Acute severe refractory exacerbation of asthma                                                    |
| ARI-AsthmaExacerbation | #734904007        | Life threatening acute exacerbation of asthma                                                     |
| ARI-AsthmaExacerbation | #734905008        | Moderate acute exacerbation of asthma                                                             |
| ARI-AsthmaExacerbation | #762521001        | Exacerbation of allergic asthma                                                                   |
| ARI-AsthmaExacerbation | #782513000        | Acute severe exacerbation of allergic asthma                                                      |
| ARI-AsthmaExacerbation | #782520007        | Exacerbation of allergic asthma due to infection                                                  |
| ARI-AsthmaExacerbation | #786836003        | Near fatal asthma                                                                                 |
| ARI-AsthmaExacerbation | #829976001        | Thunderstorm asthma                                                                               |
| ARI-AsthmaExacerbation | #99031000119107   | Acute exacerbation of asthma co-occurrent with allergic rhinitis                                  |
| ARI-COPDExacerbation   | #106001000119101  | Chronic obstructive lung disease co-occurrent with acute bronchitis                               |
| ARI-COPDExacerbation   | #1751000119100    | Acute exacerbation of chronic obstructive airways disease with asthma                             |
| ARI-COPDExacerbation   | #195951007        | Acute exacerbation of chronic obstructive airways disease                                         |
| ARI-COPDExacerbation   | #196001008        | Chronic obstructive pulmonary disease with acute lower respiratory infection                      |
| ARI-COPDExacerbation   | #285381006        | Acute infective exacerbation of chronic obstructive airways disease                               |
| ARI-COPDExacerbation   | #293241000119100  | Acute exacerbation of chronic obstructive bronchitis                                              |
| ARI-COPDExacerbation   | #408501008        | Emergency hospital admission for chronic obstructive pulmonary disease                            |
| ARI-COPDExacerbation   | #425748003        | Acute exacerbation of chronic bronchitis                                                          |
| ARI-COPDExacerbation   | #847091000000104  | Acute non-infective exacerbation of chronic obstructive pulmonary disease                         |
| ARI-ExacerOther        | #445378003        | Acute exacerbation of bronchiectasis                                                              |
| ARI-ExacerOther        | #525691000000103  | Antibiotic therapy for acute pulmonary exacerbation                                               |
| ARI-ExacerOther        | #789574002        | Acute exacerbation of idiopathic pulmonary fibrosis                                               |
| ARI-ExacerOther        | #789574002        | Acute exacerbation of idiopathic pulmonary fibrosis                                               |
| ARI-ExacerOther        | #859041000000103  | Exacerbation of cystic fibrosis                                                                   |
| ARI-ExacerOther        | #879963005        | Exacerbation of bronchiectasis caused by infection                                                |
| ARI-ExacerOther        | #12591000132100   | Suspected SARS (severe acute respiratory syndrome)                                                |
| ARI-ExacerOther        | #135883003        | Cough with fever                                                                                  |
| ARI-ExacerOther        | #195647007        | Acute respiratory infections                                                                      |
| ARI-ExacerOther        | #275498002        | Respiratory tract infection                                                                       |
| ARI-ExacerOther        | #312133006        | Viral respiratory infection                                                                       |
| ARI-ExacerOther        | #707224005        | Severe acute respiratory infection                                                                |
| ARI-CovidSuspected     | #1017214008       | SARS-CoV-2 viraemia                                                                               |
| ARI-CovidSuspected     | #1119302008       | Acute COVID-19                                                                                    |
| ARI-CovidSuspected     | #1240451000000106 | Telephone consultation for suspected SARS-CoV-2 (severe acute respiratory syndrome coronavirus 2) |

|                    |                   |                                                       |
|--------------------|-------------------|-------------------------------------------------------|
| ARI-CovidSuspected | #1300731000000106 | COVID-19 confirmed using clinical diagnostic criteria |
| ARI-CovidSuspected | #1325171000000109 | Acute COVID-19 infection                              |
| ARI-CovidSuspected | #700217006        | Suspected coronavirus infection                       |
| ARI-CovidSuspected | #840539006        | COVID-19                                              |
| ARI-CovidSuspected | #840544004        | Suspected COVID-19                                    |

## SUPPLEMENT S6: DATA SECURITY PROCEDURES AT THE RSC

**Infrastructure:** ORCHID secure servers are held physically in a locked and monitored data centre in Oxford with highly restricted access. Access, management and analysis of patient level pseudonymised data is only possible within restricted folders of the secure ORCHID server via a virtual private network (VPN) and requires multifactor authentication (MFA). Transfer of data outside of the secure server follows a strict approval process. Only aggregate and summary data can be transferred outside the secure server. Individuals accessing the data need to undertake appropriate annual data security training.

**Statistical disclosure controls (SDCs):** These are methods designed to protect the confidentiality of individuals' data in this study while still allowing for the publication of useful and accurate statistics.

1. **Anonymisation:** Although the data is not totally anonymised, all directly identifiable personal data is removed; no names or contact details are included.
2. **Pseudonymisation:** The NHS number is pseudonymised using a hashing algorithm (prior to receipt of the data). This converts the NHS number to a fixed number of digits totally distinct from the original NHS number. Although hashing is a one-way process if an individual has knowledge of an NHS number and its equivalent hashed version they could, in theory, identify the algorithm. To counter this, what's known as a salt is used. This is where a random sequence is added to the NHS numbers before hashing occurs. Without access to the salt it would be essentially impossible to determine the NHS numbers from their hashed equivalent. Data can only be formally linked back to other data sets with NHS numbers if exactly the same algorithm is applied to the data with the same salt.
3. **Perturbation:** Dates of birth have been rounded to the nearest month.
4. **Aggregation:** Data transferred out of the secure server will be summary statistics only. Thus will no longer be regarded as personal data.

**Data minimisation:** Only data required for the purpose of the study will be held within ORCHID folder within the secure server. As a consequence of these measures, identification of individuals directly or indirectly using linked data is highly unlikely, even by research members, as the data used in this specific project will be limited to that which is essential to fulfil the objectives. Identifying the individuals by triangulation of these limited data points would be exceptionally unlikely.

**SUPPLEMENT S7: VENN DIAGRAM OF CODLEIST**

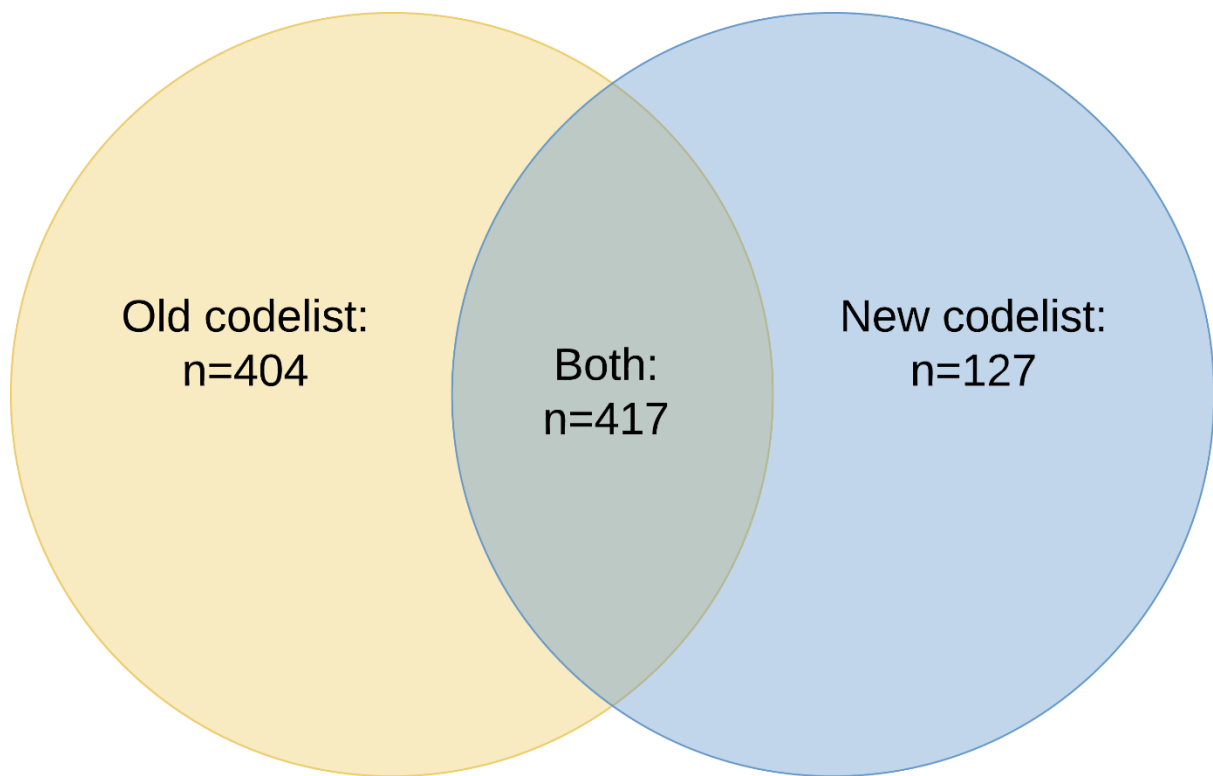

The old codelists included  $404+417=821$  codes and the new codelist included  $127+417=544$  codes. 417 codes appeared in both codelists, 404 only in the old and 127 only in the new codelists.

**SUPPLEMENT S8: ARI INCIDENCE BY AGE AND RISK GROUP**

| Indicator | Risk group | Age band | Total case during study |         |          | Weekly rate / 100k |        |
|-----------|------------|----------|-------------------------|---------|----------|--------------------|--------|
|           |            |          | New                     | Old     | % Change | New                | Old    |
| ARI       | Non-risk   | 0-17     | 813,364                 | 710,060 | 14.55    | 436.50             | 375.95 |
|           |            | 18-69    | 726,490                 | 565,643 | 28.44    | 148.80             | 115.15 |
|           |            | 70+      | 51,965                  | 41,039  | 26.62    | 128.05             | 101.00 |
|           | Risk       | 0-17     | 91,521                  | 71,978  | 27.15    | 480.45             | 387.90 |
|           |            | 18-69    | 513,302                 | 363,681 | 41.14    | 336.50             | 234.85 |
|           |            | 70+      | 281,831                 | 212,940 | 32.35    | 339.55             | 254.15 |
| ILI       | Non-risk   | 0-17     | 6,879                   | 6,879   | 0.00     | 1.95               | 1.95   |
|           |            | 18-69    | 22,233                  | 22,234  | 0.00     | 3.00               | 3.00   |
|           |            | 70+      | 1,039                   | 1,039   | 0.00     | 1.50               | 1.50   |
|           | Risk       | 0-17     | 1,006                   | 1,006   | 0.00     | 2.60               | 2.60   |
|           |            | 18-69    | 10,766                  | 10,767  | -0.01    | 4.55               | 4.55   |
|           |            | 70+      | 4,603                   | 4,604   | -0.02    | 2.80               | 2.80   |
| LRTI      | Non-risk   | 0-17     | 116,620                 | 108,154 | 7.83     | 56.55              | 54.70  |
|           |            | 18-69    | 223,505                 | 150,058 | 48.95    | 44.80              | 30.05  |
|           |            | 70+      | 31,293                  | 22,894  | 36.69    | 76.35              | 54.25  |
|           | Risk       | 0-17     | 17,512                  | 14,333  | 22.18    | 89.30              | 74.30  |
|           |            | 18-69    | 244,124                 | 179,728 | 35.83    | 159.35             | 116.40 |
|           |            | 70+      | 194,010                 | 163,895 | 18.37    | 232.80             | 197.65 |
| URTI      | Non-risk   | 0-17     | 707,263                 | 634,517 | 11.46    | 381.45             | 337.70 |
|           |            | 18-69    | 490,165                 | 408,016 | 20.13    | 98.80              | 82.30  |
|           |            | 70+      | 19,746                  | 18,322  | 7.77     | 50.25              | 46.60  |
|           | Risk       | 0-17     | 70,250                  | 60,735  | 15.67    | 369.70             | 327.10 |
|           |            | 18-69    | 215,760                 | 185,560 | 16.28    | 137.10             | 118.10 |
|           |            | 70+      | 53,697                  | 50,782  | 5.74     | 63.40              | 57.30  |

**S7:** Median weekly rate for level-1 and level-2 Acute Respiratory infection (ARI) indicators by age band and risk group compared to the previous indicators. The rate is based on denominator of 17,433,074 subjects. % change = percent change in total cases over the study period. ILI: influenza-like illness, ECLD: exacerbations of chronic lung disease. LRTI: lower respiratory tract infection, URTI: upper respiratory tract infection. Note that ECLD is a new indicator and does not have a suitable comparator. The totals numerators of level-2 indicators do not add up to the ARI numerator as we have not included cases from the level-2 ARI-NOS category.
